# Supplementary material for: Synthetic signal sequences that enable efficient secretory protein production in the yeast Kluyveromyces marxianus
Source: PubMed Central journal article supplement (PMC4347551; doi:10.1186/s12934-015-0203-y), 2015-02-14
Supplement: 12934_2015_203_MOESM1_ESM.pdf [file 12934_2015_203_MOESM1_ESM.pdf]

**Data S1** Secretion ability of the synthetic signal sequences in the yeast *Saccharomyces cerevisiae*.

Table S1-1 Analysis of the signal sequences in the yeast *Saccharomyces cerevisiae*

| Name            | Signal sequence       | $\times 10^5$ RLU $\pm$ SE | Fold | n/N   |
|-----------------|-----------------------|----------------------------|------|-------|
| Wild type       | MGVKVLFALICIAVAE      | 4.2 $\pm$ 0.8              | 1    | 24/24 |
| F <sup>13</sup> | MKFFFFFFFFFFFFFFE     | 48.1 $\pm$ 7.8             | 11   | 12/12 |
| L <sup>13</sup> | MKLLLLLLLLLLLLLLE     | 477.0 $\pm$ 417.9          | 112  | 12/12 |
| M <sup>16</sup> | MKMMMMMMMMMMMMMMME    | 6450.9 $\pm$ 1027.9        | 1513 | 15/15 |
| ScMF $\alpha$ 1 | MRFPSIFTAVLFAASSALAAE | 10906.3 $\pm$ 2317.2       | 2558 | 12/12 |

YEp plasmids containing yGLuc with various signal sequences were constructed in the yeast *Saccharomyces cerevisiae* (see Methods and Tables below). RLU; relative luminescence units (value/ $(\mu\text{l}\cdot\text{sec}\cdot\text{OD}600)$ ), Fold; ratio of GLuc activity with artificial signal sequence per wild type activity. n; number of transformants used for calculation, N; number of transformants measured. The luminescence was measured using a GloMax™ 20/20 Luminometer (Promega, Madison, WI, USA).

**Methods; Construction of yGLuc plasmids in *S. cerevisiae***

The gap-repair method was used for the plasmid construction in *S. cerevisiae* according to the previously published procedure (Makanae *et al.*, 2013). KOD FX neo DNA polymerase (Toyobo) was used for PCR reactions. For the addition of artificial signal sequences of M<sup>16</sup>, F<sup>13</sup>, and L<sup>13</sup> to yGLuc, DNA fragments were produced by PCR using TDH3-572 and 3CG9-yGLuc+558c primers from total DNA of *K. marxianus* strains RAK8772 (M<sup>16</sup>), RAK9383 (F<sup>13</sup>), and RAK10336 (L<sup>13</sup>), respectively,

as templates. The wild type yGLuc was produced using the same primers from total DNA of RAK6205 strain as a template. These PCR products were used as a template for the second PCR using TDH3-572 and ScURA3(717786TAA)-3CG9 primers. The vector DNA was prepared by PCR using URA3+771c and TDH3-1c40 primers from YEpGAP-cherry plasmid DNA (Keppler-Ross *et al.*, 2008) as a template. The second PCR products and the vector DNA were mixed and used for the transformation of *S. cerevisiae* BY4700 strain. The transformants were selected on uracil drop-out plates. For the addition of ScMF $\alpha$ 1 signal sequence to yGLuc, the wild type PCR product amplified from total DNA of RAK6205 strain was used as template for the second PCR using ScMFalpha1+13to60-yGLuc+46 and ScURA3(717786TAA)-3CG9 primers. The vector DNA fragment was amplified from YEpGAP-cherry plasmid using URA3+771c and ScTDH3p-1c-ScMFalpha1+1to52c primers. These DNA fragments were mixed and used for the transformation of BY4700.

Table S1-2 *Saccharomyces cerevisiae* strains in Supplementary Data S1

| Strain   | Genotype                                                                                     |
|----------|----------------------------------------------------------------------------------------------|
| BY4700   | <i>MATa ura3<math>\Delta</math>0</i>                                                         |
| RAK11908 | <i>MATa ura3<math>\Delta</math>0 YEp-ScTDH3p-yGLuc-ScURA3</i>                                |
| RAK11911 | <i>MATa ura3<math>\Delta</math>0 YEp-ScTDH3p-M<sup>16</sup>:yGLuc-ScURA3</i>                 |
| RAK11914 | <i>MATa ura3<math>\Delta</math>0 YEp-ScTDH3p-F<sup>13</sup>:yGLuc-ScURA3</i>                 |
| RAK11917 | <i>MATa ura3<math>\Delta</math>0 YEp-ScTDH3p-L<sup>13</sup>:yGLuc-ScURA3</i>                 |
| RAK13106 | <i>MATa ura3<math>\Delta</math>0 YEp-ScTDH3p-ScMF<math>\alpha</math>1(1-60):yGLuc-ScURA3</i> |

Table S1-3 Primers used for *S. cerevisiae* plasmid constructions in Supplementary Data S1

| Primer name                      | Sequence (5' - 3')                                                                     |
|----------------------------------|----------------------------------------------------------------------------------------|
| TDH3-572                         | gctgtaaccgtacatgcccaaat                                                                |
| 3CG9-yGLuc+558c                  | cccgggccttagtcaccaccagcacccttgatc                                                      |
| ScURA3(717786TAA)-3CG9           | aaaggggaagggatgctaaggtagagggtgaacgttacagaaaagc<br>aggctgggaagcatatttgagaagataaccgggccc |
| URA3+771c                        | ttccagcctgcttttctgtaacgt                                                               |
| TDH3-1c40                        | ttgtttgtttatgtgtttattcgaaactaagtcttg                                                   |
| ScMFalpha1+13to60-yGLuc+46       | tcaattttactgcagttttattcgagcatcctccgattagctgctgaa<br>gctaagccaaccgaaaaca                |
| ScTDH3p-1c-ScMFalpha1+1to52<br>c | atgcggaggatgctgcgaataaaaactgcagtaaaaattgaaggaaat<br>ctcattttgtttgtgtg                  |

#### References for Supplementary Data S1

Makanae K, Kintaka R, Makino T, Kitano H, Moriya H: Identification of dosage-sensitive genes in *Saccharomyces cerevisiae* using the genetic tug-of-war method. *Genome Res* 2013, 23:300-311.

Keppler-Ross S, Noffz C, Dean N: A new purple fluorescent color marker for genetic studies in *Saccharomyces cerevisiae* and *Candida albicans*. *Genetics* 2008, 179:705-710.
