# Supplementary material for: Synthetic signal sequences that enable efficient secretory protein production in the yeast Kluyveromyces marxianus
Source: PubMed Central journal article supplement (PMC4347551; doi:10.1186/s12934-015-0203-y), 2015-02-14
Supplement: 12934_2015_203_MOESM3_ESM.pdf [file 12934_2015_203_MOESM3_ESM.pdf]

**Table S3** Primers used in this study

| Primer name              | Sequence (5'-3')                                                                 |
|--------------------------|----------------------------------------------------------------------------------|
| TDH3-698                 | ataaaaaaacacgctttttcagttcg                                                       |
| 15G-yGLuc                | gggggggggggggggtagtcaccaccagcacc                                                 |
| 15C-URA3-223             | cccccccccccccaagctttcaattcatcttttttttttg                                         |
| URA3-300c                | tgttgtgaagtcattgacacag                                                           |
| KmARS7(201-260)-ADE2-797 | caagacttctgaagtgaaaaccaactttcagcttcaaactaaaaatgaaaatc<br>agtggcgctggcgcatctgttct |
| URA3+771c                | ttcccagcctgcttttctgtaacgt                                                        |
| URA3+772                 | gcatatttgagaagatgcggccagc                                                        |
| TDH3-1c40                | tttgtttgtttatgtgtgtttattcгааactaagttcttg                                         |
| yGLuc+24c                | agcgaacaagaccttgacacccat                                                         |
| yGLuc+27c                | caaagcgaacaagaccttgacaccc                                                        |
| yGLuc+30c                | gatcaaagcgaacaagaccttgaca                                                        |
| yGLuc+33c                | acagatcaaagcgaacaagaccttg                                                        |
| yGLuc+36c                | gatacagatcaaagcgaacaagacc                                                        |
| yGLuc+39c                | agcgatacagatcaaagcgaacaag                                                        |
| yGLuc+42c                | gacagcgatacagatcaaagcgaac                                                        |
| yGLuc+45c                | agcgacagcgatacagatcaaagcg                                                        |
| yGLuc+48c                | ttcagcgacagcgatacagatcaaa                                                        |
| yGLuc+51c                | agcttcagcgacagcgatacagatc                                                        |
| yGLuc+54c                | cttagcttcagcgacagcgatacag                                                        |
| yGLuc+57c                | tggcttagcttcagcgacagcgata                                                        |
| yGLuc+60c                | ggttggttagcttcagcgacagcg                                                         |
| yGLuc+63c                | ttcggttggttagcttcagcgaca                                                         |
| yGLuc+66c                | gttttcggttggttagcttcagcg                                                         |
| yGLuc+69c                | ggtgttttcggttggttagcttca                                                         |
| yGLuc+72c                | ttcgttgttttcggttggttagct                                                         |
| yGLuc+75c                | gtcttcgttgttttcggttggttagct                                                      |
| yGLuc+78c                | gaagtcttcgttgttttcggttggt                                                        |
| yGLuc+81c                | ggtgaagtcttcgttgttttcggtt                                                        |
| yGLuc+90c                | agcgacgatgttgaagtcttcgtt                                                         |
| yGLuc+108c               | agcgaagtagaagcagcagcagc                                                          |
| yGLuc+12c-TDH3-1c        | cttgacaccattttgtttgtttat                                                         |
| yGLuc+3-TDH3-1c          | cattttgtttgtttatgtgtgtttattcga                                                   |
| yGLuc+4                  | ggtgtcaaggtcttgttcgctttga                                                        |
| yGLuc+7                  | gtcaaggtcttgttcgctttgatct                                                        |
| yGLuc+10                 | aaggtcttgttcgctttgatctgta                                                        |
| yGLuc+13                 | gtcttgttcgctttgatctgtatcg                                                        |
| yGLuc+16                 | ttgttcgctttgatctgtatcgctg                                                        |
| yGLuc+19                 | ttcgtttgatctgtatcgctgctg                                                         |

|              |                              |
|--------------|------------------------------|
| yGLuc+22     | gctttgatctgtatcgctgctgctg    |
| yGLuc+25     | ttgatctgtatcgctgctgctgaag    |
| yGLuc+28     | atctgtatcgctgctgctgaagcta    |
| yGLuc+31     | tgtatcgctgctgctgaagctaage    |
| yGLuc+34     | atcgtgctgctgaagctaagccaa     |
| yGLuc+37     | gctgctgctgaagctaagccaaccg    |
| yGLuc+40     | gctgctgaagctaagccaaccgaaa    |
| yGLuc+43     | gctgaagctaagccaaccgaaaaca    |
| yGLuc+46     | gaagctaagccaaccgaaaacaacg    |
| yGLuc+49     | gctaagccaaccgaaaacaacgaag    |
| yGLuc+52     | aagccaaccgaaaacaacgaagact    |
| yGLuc+55     | ccaaccgaaaacaacgaagacttca    |
| yGLuc+58     | accgaaaacaacgaagacttcaaca    |
| yGLuc+61     | gaaaacaacgaagacttcaacatcg    |
| yGLuc+64     | aacaacgaagacttcaacatcgctg    |
| yGLuc+70     | gaagacttcaacatcgctgctgctg    |
| yGLuc+73     | gacttcaacatcgctgctgctgctt    |
| yGLuc+76     | ttcaacatcgctgctgctgcttcta    |
| yGLuc+79     | aacatcgctgctgctgcttctaact    |
| yGLuc+82     | atcgtcgtgctgcttctaactteg     |
| yGLuc+91     | gctgcttctaacttegctaccaccg    |
| yGLuc+100    | aacttegctaccaccgacttgagcg    |
| yGLuc+109    | accaccgacttgagcgctgacagag    |
| yGLuc+118    | ttgagcgctgacagaggtaagtgc     |
| Fc-yGLuc+45c | gaaagcgacagcgatacagatcaaagcg |
| Lc-yGLuc+45c | caaagcgacagcgatacagatcaaagcg |
| Ic-yGLuc+45c | gatagcgacagcgatacagatcaaagcg |
| Mc-yGLuc+45c | catagcgacagcgatacagatcaaagcg |
| Vc-yGLuc+45c | aacagcgacagcgatacagatcaaagcg |
| Sc-yGLuc+45c | ggaagcgacagcgatacagatcaaagcg |
| Pc-yGLuc+45c | tggagcgacagcgatacagatcaaagcg |
| Tc-yGLuc+45c | ggtagcgacagcgatacagatcaaagcg |
| Ac-yGLuc+45c | agcagcgacagcgatacagatcaaagcg |
| Yc-yGLuc+45c | gtaagcgacagcgatacagatcaaagcg |
| Hc-yGLuc+45c | gtgagcgacagcgatacagatcaaagcg |
| Qc-yGLuc+45c | ttgagcgacagcgatacagatcaaagcg |
| Nc-yGLuc+45c | gttagcgacagcgatacagatcaaagcg |
| Kc-yGLuc+45c | cttagcgacagcgatacagatcaaagcg |
| Dc-yGLuc+45c | gtcagcgacagcgatacagatcaaagcg |
| Cc-yGLuc+45c | acaagcgacagcgatacagatcaaagcg |
| Wc-yGLuc+45c | ccaagcgacagcgatacagatcaaagcg |









|                              |                                                                                                      |
|------------------------------|------------------------------------------------------------------------------------------------------|
| TAA+(1-54)-hGLuc+49          | atgatggcgcggtgggtgctctatttctgtacggccttcaggtcgcggcacct<br>gccaagcccaccgagaacaacgaagacttcaacatcgt      |
| SfGLU1+(1-54)-hGLuc+49       | atgaaattcgggtgtttatccccgcttttctgtctattgttagtgctttacctgcca<br>gcccaccgagaacaacgaagacttcaacatcgt       |
| AmyLN5C+(1-27)c-TDH3-1<br>c  | ggcgtaaagccgttttgtgtttcattttgtttgtttatgtgtgtttattcga                                                 |
| AmyLN5C+(28-69)-hGLuc+<br>49 | cgattgctgacgctgttatttgcgctcatcttctgtgctgccaagcccaccg<br>agaacaacgaagacttcaacatcgt                    |
| KmPGU1+(1-54)-hGLuc+49       | atgttattcagcaacacctattaatcgcagcagctagtgcattattagctgaag<br>ccaagcccaccgagaacaacgaagacttcaacatcGT      |
| hIL6+(1-33)c-TDH3-1c         | tggaccgaaggcacttgtggagaaggagttcattttgtttgtttatgtgtgttta                                              |
| hIL6+(34-69)-hGLuc+49        | gttgcttctccctggggctgctcctgggtgtgctgtaagccaaccgaaaac<br>aacgaag                                       |
| hEPO+(1-21)c-TDH3-1c         | aggacaaccgtgcacccccattttgtttgtttatgtgtgttta                                                          |
| hEPO+(22-60)-yGLuc+49        | gcctggctgtggttctctctgctcctgctgctgctcctgctaagccaaccgaa<br>aacaacgaag                                  |
| hLIF+(1-30)c-TDH3-1c         | gggcacaactcctgccgccaagaccttattttgtttgtttatgtgtgtttattcga                                             |
| hLIF+(31-78)-yGLuc+49        | ctgctgttggttctgactggaaacatggggcgaggagccccctccccgcta<br>agccaaccgaaaacaacgaag                         |
| hZA2G+(1-18)c-TDH3-1c*       | aggcaccattctaccattttgtttgtttatgtgtgttta                                                              |
| hZA2G+(19-51)-yGLuc+49*      | gtcctgctgtctctgctgctgcttctgggtcctgctaagccaaccgaaaacaac<br>gaag                                       |
| 3CG9-yGLuc+558c              | cccggggcccttagtcaccaccagcacccttgatc                                                                  |
| KmACT1+16                    | gcagaggctgctgcttttagttattg                                                                           |
| KmACT+1111c                  | atggaccagattcgtcgtattcttg                                                                            |
| hLIF+1                       | atgaaggtcttggcggcaggag                                                                               |
| hLIF+694c                    | gcacctgaggagtgaattcc                                                                                 |
| 3CG9-FLAGc-hLIF+609c         | cccggggcccttacttgcgtcgtcgtcctttagtcgaaggcctgggccaaca<br>cggcgtatg                                    |
| URA3+772term3CG9             | gcataattgagaagataaaaaactgtattataagtaaatgcatgtataactaaactc<br>acaaattagacttcaatttaattatcagttaccgggccc |
| MKM(16)Ec-TDH3p-1c           | ctccatcatcatcatcatcatcatcatcatcatcatcatcatcatcatcattttcattt<br>tgtttgtttatgtgtgtttattcga             |
| hLIF+4                       | aaggtcttggcggcaggagt                                                                                 |

\*hZA2G is an alternative name for hAZGP1.
