# Supplementary material for: Synthetic signal sequences that enable efficient secretory protein production in the yeast Kluyveromyces marxianus
Source: PubMed Central journal article supplement (PMC4347551; doi:10.1186/s12934-015-0203-y), 2015-02-14
Supplement: 12934_2015_203_MOESM4_ESM.pdf [file 12934_2015_203_MOESM4_ESM.pdf]

**Table S4** Primer pairs for plasmid DNA constructions

| Construct name | Primer 1          | Primer 2  |
|----------------|-------------------|-----------|
| Wild type      | URA3+771c         | URA3+772  |
| G2Δ            | yGLuc+3-TDH3-1c   | yGLuc+7   |
| G2V3Δ          | yGLuc+3-TDH3-1c   | yGLuc+10  |
| G2-K4Δ         | yGLuc+3-TDH3-1c   | yGLuc+13  |
| V5Δ            | yGLuc+12c-TDH3-1c | yGLuc+16  |
| V5L6Δ          | yGLuc+12c-TDH3-1c | yGLuc+19  |
| V5-F7Δ         | yGLuc+12c-TDH3-1c | yGLuc+22  |
| V5-A8V         | yGLuc+12c-TDH3-1c | yGLuc+25  |
| L9Δ            | yGLuc+24c         | yGLuc+28  |
| I10Δ           | yGLuc+27c         | yGLuc+31  |
| C11Δ           | yGLuc+30c         | yGLuc+34  |
| I12Δ           | yGLuc+33c         | yGLuc+37  |
| A13Δ           | yGLuc+36c         | yGLuc+40  |
| V14Δ           | yGLuc+39c         | yGLuc+43  |
| A15Δ           | yGLuc+42c         | yGLuc+46  |
| E16Δ           | yGLuc+45c         | yGLuc+49  |
| A17Δ           | yGLuc+48c         | yGLuc+52  |
| K18Δ           | yGLuc+51c         | yGLuc+55  |
| P19Δ           | yGLuc+54c         | yGLuc+58  |
| T20Δ           | yGLuc+57c         | yGLuc+61  |
| T20-N23Δ       | yGLuc+57c         | yGLuc+70  |
| E21-N23Δ       | yGLuc+60c         | yGLuc+70  |
| E24-F26Δ       | yGLuc+69c         | yGLuc+79  |
| E21Δ           | yGLuc+60c         | yGLuc+64  |
| N22N23Δ        | yGLuc+63c         | yGLuc+70  |
| N23Δ           | yGLuc+66c         | yGLuc+70  |
| E24Δ           | yGLuc+69c         | yGLuc+73  |
| D25Δ           | yGLuc+72c         | yGLuc+76  |
| F26Δ           | yGLuc+75c         | yGLuc+79  |
| N27Δ           | yGLuc+78c         | yGLuc+82  |
| I28-A30Δ       | yGLuc+81c         | yGLuc+91  |
| V31-S33Δ       | yGLuc+90c         | yGLuc+100 |

|          |              |           |
|----------|--------------|-----------|
| V31-A36Δ | yGLuc+90c    | yGLuc+109 |
| T37-D39Δ | yGLuc+108c   | yGLuc+118 |
| 16EF     | Fc-yGLuc+45c | yGLuc+49  |
| 16EL     | Lc-yGLuc+45c | yGLuc+49  |
| 16EI     | Ic-yGLuc+45c | yGLuc+49  |
| 16EM     | Mc-yGLuc+45c | yGLuc+49  |
| 16EV     | Vc-yGLuc+45c | yGLuc+49  |
| 16ES     | Sc-yGLuc+45c | yGLuc+49  |
| 16EP     | Pc-yGLuc+45c | yGLuc+49  |
| 16ET     | Tc-yGLuc+45c | yGLuc+49  |
| 16EA     | Ac-yGLuc+45c | yGLuc+49  |
| 16EY     | Yc-yGLuc+45c | yGLuc+49  |
| 16EH     | Hc-yGLuc+45c | yGLuc+49  |
| 16EQ     | Qc-yGLuc+45c | yGLuc+49  |
| 16EN     | Nc-yGLuc+45c | yGLuc+49  |
| 16EK     | Kc-yGLuc+45c | yGLuc+49  |
| 16ED     | Dc-yGLuc+45c | yGLuc+49  |
| 16EC     | Cc-yGLuc+45c | yGLuc+49  |
| 16EW     | Wc-yGLuc+45c | yGLuc+49  |
| 16ER     | Rc-yGLuc+45c | yGLuc+49  |
| 16EG     | Gc-yGLuc+45c | yGLuc+49  |
| G2V3Δ4KF | MFc-TDH3-1c  | yGLuc+13  |
| G2V3Δ4KL | MLc-TDH3-1c  | yGLuc+13  |
| G2V3Δ4KI | Mlc-TDH3-1c  | yGLuc+13  |
| G2V3Δ4KM | MMc-TDH3-1c  | yGLuc+13  |
| G2V3Δ4KV | MVc-TDH3-1c  | yGLuc+13  |
| G2V3Δ4KS | MSc-TDH3-1c  | yGLuc+13  |
| G2V3Δ4KP | MPc-TDH3-1c  | yGLuc+13  |
| G2V3Δ4KT | MTc-TDH3-1c  | yGLuc+13  |
| G2V3Δ4KA | MAc-TDH3-1c  | yGLuc+13  |
| G2V3Δ4KY | MYc-TDH3-1c  | yGLuc+13  |
| G2V3Δ4KH | MHc-TDH3-1c  | yGLuc+13  |
| G2V3Δ4KQ | MQc-TDH3-1c  | yGLuc+13  |
| G2V3Δ4KN | MNc-TDH3-1c  | yGLuc+13  |
| G2V3Δ4KD | MDC-TDH3-1c  | yGLuc+13  |

|                  |             |                   |
|------------------|-------------|-------------------|
| G2V3ΔKE          | MEc-TDH3-1c | yGLuc+13          |
| G2V3ΔKC          | MCc-TDH3-1c | yGLuc+13          |
| G2V3Δ4KW         | MWc-TDH3-1c | yGLuc+13          |
| G2V3ΔKR          | MRc-TDH3-1c | yGLuc+13          |
| G2V3Δ4KG         | MGc-TDH3-1c | yGLuc+13          |
| KL <sup>8</sup>  | TDH3-1c40   | MKL(8)-hGLuc+37   |
| RL <sup>8</sup>  | TDH3-1c40   | MRL(8)-hGLuc+37   |
| RM <sup>8</sup>  | TDH3-1c40   | MRM(8)-hGLuc+37   |
| RF <sup>8</sup>  | TDH3-1c40   | MRF(8)-hGLuc+37   |
| RA <sup>8</sup>  | TDH3-1c40   | MRA(8)-hGLuc+37   |
| RW <sup>8</sup>  | TDH3-1c40   | MRW(8)-hGLuc+37   |
| RV <sup>8</sup>  | TDH3-1c40   | MRV(8)-hGLuc+37   |
| RY <sup>8</sup>  | TDH3-1c40   | MRY(8)-hGLuc+37   |
| RI <sup>8</sup>  | TDH3-1c40   | MRI(8)-hGLuc+37   |
| RS <sup>8</sup>  | TDH3-1c40   | MRS(8)-hGLuc+37   |
| RT <sup>8</sup>  | TDH3-1c40   | MRT(8)-hGLuc+37   |
| RQ <sup>8</sup>  | TDH3-1c40   | MRQ(8)-hGLuc+37   |
| RC <sup>8a</sup> | TDH3-1c40   | MRC(8)-hGLuc+37   |
| L <sup>7</sup>   | TDH3-1c40   | MKL(7)-hGLuc+46   |
| L <sup>8</sup>   | TDH3-1c40   | MKL(8)-hGLuc+46   |
| L <sup>9</sup>   | TDH3-1c40   | MKL(9)-hGLuc+46   |
| L <sup>10</sup>  | TDH3-1c40   | MKL(10)-hGLuc+46  |
| L <sup>11</sup>  | TDH3-1c40   | MKL(11)-hGLuc+46  |
| L <sup>12</sup>  | TDH3-1c40   | MKL(12)-hGLuc+46  |
| L <sup>13</sup>  | TDH3-1c40   | MKL(13)-hGLuc+46  |
| L <sup>14</sup>  | TDH3-1c40   | MKL(14)-hGLuc+46  |
| L <sup>15</sup>  | TDH3-1c40   | MKL(15)-hGLuc+46  |
| L <sup>16</sup>  | TDH3-1c40   | MKL(16)-hGLuc+46  |
| L <sup>17</sup>  | TDH3-1c40   | MKL(17)-hGLuc+46  |
| L <sup>13F</sup> | TDH3-1c40   | MKL(13)F-hGLuc+46 |
| L <sup>13L</sup> | TDH3-1c40   | MKL(13)L-hGLuc+46 |
| L <sup>13I</sup> | TDH3-1c40   | MKL(13)I-hGLuc+46 |
| L <sup>13M</sup> | TDH3-1c40   | MKL(13)M-hGLuc+46 |
| L <sup>13V</sup> | TDH3-1c40   | MKL(13)V-hGLuc+46 |
| L <sup>13S</sup> | TDH3-1c40   | MKL(13)S-hGLuc+46 |

|                   |           |                   |
|-------------------|-----------|-------------------|
| L <sup>13</sup> P | TDH3-1c40 | MKL(13)P-hGLuc+46 |
| L <sup>13</sup> T | TDH3-1c40 | MKL(13)T-hGLuc+46 |
| L <sup>13</sup> A | TDH3-1c40 | MKL(13)A-hGLuc+46 |
| L <sup>13</sup> Y | TDH3-1c40 | MKL(13)Y-hGLuc+46 |
| L <sup>13</sup> H | TDH3-1c40 | MKL(13)H-hGLuc+46 |
| L <sup>13</sup> Q | TDH3-1c40 | MKL(13)Q-hGLuc+46 |
| L <sup>13</sup> N | TDH3-1c40 | MKL(13)N-hGLuc+46 |
| L <sup>13</sup> K | TDH3-1c40 | MKL(13)K-hGLuc+46 |
| L <sup>13</sup> D | TDH3-1c40 | MKL(13)D-hGLuc+46 |
| L <sup>13</sup> C | TDH3-1c40 | MKL(13)C-hGLuc+46 |
| L <sup>13</sup> W | TDH3-1c40 | MKL(13)W-hGLuc+46 |
| L <sup>13</sup> R | TDH3-1c40 | MKL(13)R-hGLuc+46 |
| L <sup>13</sup> G | TDH3-1c40 | MKL(13)G-hGLuc+46 |
| L <sup>13</sup> F | TDH3-1c40 | MKL(13)F-hGLuc+46 |
| L <sup>13</sup> L | TDH3-1c40 | MKL(13)L-hGLuc+46 |
| L <sup>13</sup> I | TDH3-1c40 | MKL(13)I-hGLuc+46 |
| L <sup>13</sup> M | TDH3-1c40 | MKL(13)M-hGLuc+46 |
| L <sup>13</sup> V | TDH3-1c40 | MKL(13)V-hGLuc+46 |
| L <sup>13</sup> S | TDH3-1c40 | MKL(13)S-hGLuc+46 |
| L <sup>13</sup> P | TDH3-1c40 | MKL(13)P-hGLuc+46 |
| L <sup>13</sup> T | TDH3-1c40 | MKL(13)T-hGLuc+46 |
| L <sup>13</sup> A | TDH3-1c40 | MKL(13)A-hGLuc+46 |
| L <sup>13</sup> Y | TDH3-1c40 | MKL(13)Y-hGLuc+46 |
| L <sup>13</sup> H | TDH3-1c40 | MKL(13)H-hGLuc+46 |
| L <sup>13</sup> Q | TDH3-1c40 | MKL(13)Q-hGLuc+46 |
| L <sup>13</sup> N | TDH3-1c40 | MKL(13)N-hGLuc+46 |
| L <sup>13</sup> K | TDH3-1c40 | MKL(13)K-hGLuc+46 |
| L <sup>13</sup> D | TDH3-1c40 | MKL(13)D-hGLuc+46 |
| L <sup>13</sup> C | TDH3-1c40 | MKL(13)C-hGLuc+46 |
| L <sup>13</sup> W | TDH3-1c40 | MKL(13)W-hGLuc+46 |
| L <sup>13</sup> R | TDH3-1c40 | MKL(13)R-hGLuc+46 |
| L <sup>13</sup> G | TDH3-1c40 | MKL(13)G-hGLuc+46 |
| I <sup>7a</sup>   | TDH3-1c40 | MKI(7)-hGLuc+46   |
| I <sup>8a</sup>   | TDH3-1c40 | MKI(8)-hGLuc+46   |
| I <sup>9a</sup>   | TDH3-1c40 | MKI(9)-hGLuc+46   |

|                 |                                    |                                     |
|-----------------|------------------------------------|-------------------------------------|
| I <sup>10</sup> | TDH3-1c40                          | MKI(10)-hGLuc+46                    |
| I <sup>11</sup> | TDH3-1c40                          | MKI(11)-hGLuc+46                    |
| I <sup>12</sup> | TDH3-1c40                          | MKI(12)-hGLuc+46                    |
| I <sup>13</sup> | TDH3-1c40                          | MKI(13)-hGLuc+46                    |
| I <sup>14</sup> | TDH3-1c40                          | MKI(14)-hGLuc+46                    |
| I <sup>15</sup> | TDH3-1c40                          | MKI(15)-hGLuc+46                    |
| I <sup>16</sup> | TDH3-1c40                          | MKI(16)-hGLuc+46                    |
| I <sup>17</sup> | TDH3-1c40                          | MKI(17)-hGLuc+46                    |
| F <sup>7a</sup> | TDH3-1c40                          | MKF(7)-hGLuc+46                     |
| F <sup>8</sup>  | TDH3-1c40                          | MKF(8)-hGLuc+46                     |
| F <sup>9</sup>  | TDH3-1c40                          | MKF(9)-hGLuc+46                     |
| F <sup>10</sup> | TDH3-1c40                          | MKF(10)-hGLuc+46                    |
| F <sup>11</sup> | TDH3-1c40                          | MKF(11)-hGLuc+46                    |
| F <sup>13</sup> | TDH3-1c40                          | MKF(13)-hGLuc+46                    |
| F <sup>15</sup> | TDH3-1c40                          | MKF(15)-hGLuc+46                    |
| F <sup>17</sup> | TDH3-1c40                          | MKF(17)-hGLuc+46                    |
| M <sup>7a</sup> | TDH3-1c40                          | MKM(7)-hGLuc+46                     |
| M <sup>8a</sup> | TDH3-1c40                          | MKM(8)-hGLuc+46                     |
| M <sup>9a</sup> | TDH3-1c40                          | MKM(9)-hGLuc+46                     |
| M <sup>10</sup> | TDH3-1c40                          | MKM(10)-hGLuc+46                    |
| M <sup>11</sup> | TDH3-1c40                          | MKM(11)-hGLuc+46                    |
| M <sup>12</sup> | TDH3-1c40                          | MKM(12)-hGLuc+46                    |
| M <sup>13</sup> | TDH3-1c40                          | MKM(13)-hGLuc+46                    |
| M <sup>14</sup> | TDH3-1c40                          | MKM(14)-hGLuc+46                    |
| M <sup>15</sup> | TDH3-1c40                          | MKM(15)-hGLuc+46                    |
| M <sup>16</sup> | TDH3-1c40                          | MKM(16)-hGLuc+46                    |
| M <sup>17</sup> | TDH3-1c40                          | MKM(17)-hGLuc+46                    |
| AoTAA           | TDH3-1c40                          | TAA+(1-54)-hGLuc+49                 |
| SfGLU1          | TDH3-1c40                          | SfGLU1+(1-54)-hGLuc+49              |
| BlAmyL          | AmyLN5C+(1-27)c-TDH3-1c            | AmyLN5C+(28-69)-hGLuc+49            |
| KmPGU1          | TDH3-1c                            | KmPGU1+(1-54)-hGLuc+49              |
| hIL6            | hIL6+(1-33)c-TDH3-1c               | hIL6+(34-69)-hGLuc+49               |
| hEPO            | hEPO+(1-21)c-TDH3-1c               | hEPO+(22-60)-yGLuc+49               |
| hLIF            | hLIF+(1-30)c-TDH3-1c               | hLIF+(31-78)-yGLuc+49               |
| hAZGP1          | hZA2G+(1-18)c-TDH3-1c <sup>b</sup> | hZA2G+(19-51)-yGLuc+49 <sup>b</sup> |

<sup>a</sup>These constructs showed the same level of null value, thus data were not shown in the result. <sup>b</sup>hZA2G is an alternative name for hAZGP1.
